# Supplementary material for: Forest canopy structure response to climate change from a global perspective
Source: Research Square preprint supplement (doi:10.21203/rs.3.rs-5598668/v1), 2024-12-24

**Supplementary Information**

**Forest canopy structure response to climate change from a global perspective**

**Supplementary Tables**

**Supplementary Table 1. La Niña events since 1950.** We collected the timing and intensity of La Niña occurrences since 1950.

| **Starting date and ending date** | **Peak time** | **Peak intensity rating** |
| --- | --- | --- |
| 1950.01-1951.02 | 1950.01 | Moderate |
| 1954.07-1956.04 | 1955.10 | Moderate |
| 1964.05-1965.01 | 1964.11 | Weak |
| 1970.07-1972.01 | 1971.01 | Moderate |
| 1973.06-1974.06 | 1973.12 | Moderate |
| 1975.04-1976.04 | 1975.12 | Moderate |
| 1984.10-1985.06 | 1985.01 | Weak |
| 1988.05-1989.05 | 1988.12 | Strong |
| 1995.09-1996.03 | 1995.11 | Weak |
| 1998.07-2000.06 | 2000.01 | Moderate |
| 2000.10-2001.02 | 2000.12 | Weak |
| 2007.08-2008.05 | 2008.01 | Moderate |
| 2010.06-2011.05 | 2010.12 | Moderate |
| 2011.08-2012.03 | 2011.12 | Weak |
| 2017.10-2018.03 | 2018.01 | Weak |
| 2020.08-2021.03 | 2020.11 | Moderate |

Data from the National Climatic Center（http://www.ncc-cma.net/）

**Supplementary Table 2. Weighting of indicators, 2005-2021.** The weights of the indicators we calculated did not change significantly over the period 2005-2021, with PTC (0.52±0.01) having the largest weight and CI (0.09 or 0.1) the smallest.

| Year | **2005** | **2006** | **2007** | **2008** | **2009** | **2010** | **2011** | **2012** | **2013** | **2014** | **2015** | **2016** | **2017** | **2018** | **2019** | **2020** | **2021** |
| --- | --- | --- | --- | --- | --- | --- | --- | --- | --- | --- | --- | --- | --- | --- | --- | --- | --- |
| CI | 0.10 | 0.09 | 0.09 | 0.10 | 0.10 | 0.09 | 0.10 | 0.09 | 0.10 | 0.09 | 0.10 | 0.09 | 0.10 | 0.10 | 0.10 | 0.10 | 0.09 |
| PTC | 0.52 | 0.53 | 0.52 | 0.52 | 0.52 | 0.52 | 0.51 | 0.52 | 0.53 | 0.53 | 0.52 | 0.53 | 0.52 | 0.52 | 0.52 | 0.53 | 0.53 |
| LAI | 0.27 | 0.26 | 0.26 | 0.26 | 0.26 | 0.27 | 0.27 | 0.26 | 0.26 | 0.26 | 0.26 | 0.26 | 0.26 | 0.26 | 0.26 | 0.26 | 0.26 |
| NDVI | 0.11 | 0.11 | 0.12 | 0.12 | 0.12 | 0.12 | 0.12 | 0.12 | 0.12 | 0.12 | 0.12 | 0.12 | 0.12 | 0.11 | 0.11 | 0.11 | 0.12 |

**Supplementary Table 3. Results of the VIF test for each indicator, 2005-2021.** None of our calculated VIFs for each metric was greater than 10, which indicates that there is no multicollinearity among the four metrics, CI, PTC, LAI, and NDVI.

| Year | **2005** | **2006** | **2007** | **2008** | **2009** | **2010** | **2011** | **2012** | **2013** | **2014** | **2015** | **2016** | **2017** | **2018** | **2019** | **2020** | **2021** |
| --- | --- | --- | --- | --- | --- | --- | --- | --- | --- | --- | --- | --- | --- | --- | --- | --- | --- |
| CI | 1.16 | 1.14 | 1.14 | 1.16 | 1.17 | 1.18 | 1.18 | 1.18 | 1.18 | 1.18 | 1.18 | 1.17 | 1.17 | 1.18 | 1.19 | 1.18 | 1.15 |
| PTC | 1.90 | 1.87 | 1.92 | 1.94 | 1.96 | 1.93 | 1.93 | 1.93 | 1.94 | 2.01 | 2.01 | 2.01 | 1.96 | 1.97 | 1.98 | 1.99 | 1.92 |
| LAI | 1.95 | 1.94 | 1.99 | 1.97 | 1.97 | 1.93 | 1.93 | 1.93 | 1.95 | 2.00 | 2.01 | 2.01 | 1.98 | 1.97 | 1.95 | 1.97 | 1.94 |
| NDVI | 1.22 | 1.22 | 1.22 | 1.23 | 1.23 | 1.23 | 1.23 | 1.23 | 1.23 | 1.22 | 1.22 | 1.22 | 1.23 | 1.22 | 1.22 | 1.22 | 1.22 |

**Supplementary Table 4. Mann-Kendall test for trend categories.** In this study, three significance levels = 0.01, = 0.05 and = 0.1 are given, so when the absolute value of Z is greater than 1.65, 1.96 and 2.58, it means that the trend passes the significance test with a confidence level of 90 %, 95 % and 99 %, respectively.

|  | Z | Trend type | Trend features |
| --- | --- | --- | --- |
|  | 2.58 < Z | 4 | Extremely significant increase |
| 1.96 < Z ≤ 2.58 | 3 | Significant increase |
| 1.65 < Z ≤1.96 | 2 | Slightly significant increase |
| Z ≤ 1.65 | 1 | No significant increase |
|  | Z | 0 | No change |
|  | Z ≤ 1.65 | -1 | No significant reduction |
| 1.65 < Z ≤1.96 | -2 | Slightly significant reduction |
| 1.96 < Z ≤ 2.58 | -3 | Significant reduction |
| 2.58 < Z | -4 | Extremely significant reduction |

Where, is the degree of trend, when < 0, it indicates that FSSI has a decreasing trend over time, and when > 0, it indicates that FSSI has an increasing trend over time.

**Supplementary Table 5. The ten climate variables selected for this study.**

| **label** | **variable** | **descriptive** | **units** |
| --- | --- | --- | --- |
| CLD | cloud cover | Indicates the percentage of the sky covered by clouds | percentage (%) |
| DTR | diurnal temperature range | Refers to the difference between the highest and lowest temperatures in a day | degrees Celsius |
| FRS | frost day frequency | Means the number of days in a month when frost occurs | days |
| PET | potential evapotranspiration | Means the maximum evaptranspiration that may be achieved in an area under a given meteorological condition if there is sufficient moisture supply | millimetres per day |
| PRE | precipitation | Means the total amount of precipitation in a month | millimetres per month |
| TMP | monthly average daily mean temperature | Means the average temperature at an altitude of 2 meters above ground level | degrees Celsius |
| TMN | monthly average daily minimum temperature | Means the average monthly minimum temperature at an altitude of 2 m above ground level | degrees Celsius |
| TMX | monthly average daily maximum temperature | Means the average monthly maximum temperature at an altitude of 2 m above ground level | degrees Celsius |
| VAP | vapour pressure | Means the partial pressure of water vapor in the air | hectopascals (hPa) |
| WET | wet day frequency | Refers to the number of days with ≥0.1 mm of precipitation per month. | days |

Data from website: https://crudata.uea.ac.uk/cru/data/hrg/

**Supplementary Table 6. Results of correlation tests between FSSI and climate variables, 2005-2021.**

|  |  | WET | | | VAP | | | TMX | | | TMP | | | TMN | | | PRE | | | PET | | | FRS | | | DTR | | | CLD | | |
| --- | --- | --- | --- | --- | --- | --- | --- | --- | --- | --- | --- | --- | --- | --- | --- | --- | --- | --- | --- | --- | --- | --- | --- | --- | --- | --- | --- | --- | --- | --- | --- |
| Year |  | A | B | C | A | B | C | A | B | C | A | B | C | A | B | C | A | B | C | A | B | C | A | B | C | A | B | C | A | B | C |
| 2005 | Pearson Correlation | **.435**** | .382** | .292** | .434** | .442** | **.444**** | .355** | **.358**** | .350** | .373** | .**376**** | .372** | .384** | **.387**** | .382** | **.460**** | .410** | .311** | .035** | -.042** | **-.158**** | -.306** | **-.311**** | -.285** | **-.283**** | -.265** | -.246** | **.374**** | .315** | .220** |
| Significance (two-tailed) | 0.000 | 0.000 | 0.000 | 0.000 | 0.000 | 0.000 | 0.000 | 0.000 | 0.000 | 0.000 | 0.000 | 0.000 | 0.000 | 0.000 | 0.000 | 0.000 | 0.000 | 0.000 | 0.000 | 0.000 | 0.000 | 0.000 | 0.000 | 0.000 | 0.000 | 0.000 | 0.000 | 0.000 | 0.000 | 0.000 |
| 2006 | Pearson Correlation | **.413**** | .391** | .325** | .413** | .421** | .**427**** | .330** | .336** | **.337**** | .347** | .353** | **.357**** | .358** | .363** | **.365**** | **.453**** | .408** | .330** | .002** | -.090** | **-.219**** | -.284** | **-.290**** | -.283** | **-.272**** | -.264** | -.253** | **.372**** | .334** | .255** |
| Significance (two-tailed) | 0.000 | 0.000 | 0.000 | 0.000 | 0.000 | 0.000 | 0.000 | 0.000 | 0.000 | 0.000 | 0.000 | 0.000 | 0.000 | 0.000 | 0.000 | 0.000 | 0.000 | 0.000 | 0.000 | 0.000 | 0.000 | 0.000 | 0.000 | 0.000 | 0.000 | 0.000 | 0.000 | 0.000 | 0.000 | 0.000 |
| 2007 | Pearson Correlation | **.428**** | .370** | .256** | .430** | .436** | .**436**** | .353** | **.358**** | .352** | .370** | **.374**** | .371** | .381** | **.383**** | .379** | **.468**** | .410** | .312** | .040** | -.027** | **-.114**** | -.310** | **-.315**** | -.301** | **-.267**** | -.239** | -.206** | **.357**** | .284** | .166** |
| Significance (two-tailed) | 0.000 | 0.000 | 0.000 | 0.000 | 0.000 | 0.000 | 0.000 | 0.000 | 0.000 | 0.000 | 0.000 | 0.000 | 0.000 | 0.000 | 0.000 | 0.000 | 0.000 | 0.000 | 0.000 | 0.000 | 0.000 | 0.000 | 0.000 | 0.000 | 0.000 | 0.000 | 0.000 | 0.000 | 0.000 | 0.000 |
| 2008 | Pearson Correlation | **.432**** | .398** | .344** | .430** | .438** | **.439**** | .354** | **.359**** | .344** | .370** | **.376**** | .368** | .380** | **.386**** | .379** | **.456**** | .409** | .334** | .029** | -.065** | **-.195**** | -.305** | **-.313**** | -.301** | **-.285**** | -.268** | -.253** | **.350**** | .332** | .290** |
| Significance (two-tailed) | 0.000 | 0.000 | 0.000 | 0.000 | 0.000 | 0.000 | 0.000 | 0.000 | 0.000 | 0.000 | 0.000 | 0.000 | 0.000 | 0.000 | 0.000 | 0.000 | 0.000 | 0.000 | 0.000 | 0.000 | 0.000 | 0.000 | 0.000 | 0.000 | 0.000 | 0.000 | 0.000 | 0.000 | 0.000 | 0.000 |
| 2009 | Pearson Correlation | **.438**** | .413** | .324** | .439** | **.443**** | .442** | **.362**** | .361** | .354** | .378** | **.379**** | .373** | .388** | **.389**** | .383** | **.468**** | .453** | .364** | .025** | -.060** | **-.160**** | -.313** | **-.319**** | -.302** | **-.289**** | -.280** | -.255** | .270** | **.343**** | .260** |
| Significance (two-tailed) | 0.000 | 0.000 | 0.000 | 0.000 | 0.000 | 0.000 | 0.000 | 0.000 | 0.000 | 0.000 | 0.000 | 0.000 | 0.000 | 0.000 | 0.000 | 0.000 | 0.000 | 0.000 | 0.000 | 0.000 | 0.000 | 0.000 | 0.000 | 0.000 | 0.000 | 0.000 | 0.000 | 0.000 | 0.000 | 0.000 |
| 2010 | Pearson Correlation | **.425**** | .385** | .317** | .434** | **.441**** | .440** | .354** | **.359**** | .352** | .369** | **.375**** | .371** | .379** | **.383**** | .379** | **.443**** | .401** | .327** | .049** | -.026** | **-.126**** | -.306** | **-.312**** | -.294** | **-.264**** | -.249** | -.220** | **.360**** | .299** | .179** |
| Significance (two-tailed) | 0.000 | 0.000 | 0.000 | 0.000 | 0.000 | 0.000 | 0.000 | 0.000 | 0.000 | 0.000 | 0.000 | 0.000 | 0.000 | 0.000 | 0.000 | 0.000 | 0.000 | 0.000 | 0.000 | 0.000 | 0.000 | 0.000 | 0.000 | 0.000 | 0.000 | 0.000 | 0.000 | 0.000 | 0.000 | 0.000 |
| 2011 | Pearson Correlation | **.466**** | .431** | .350** | .432** | .437** | **.440**** | .340** | **.342**** | .337** | .360** | **.365**** | .364** | .375** | **.378**** | .378** | **.481**** | .434** | .348** | -.017** | -.085** | **-.188**** | -.296** | **-.301**** | -.290** | **-.304**** | -.277** | -.260** | **.395**** | .343** | .274** |
| Significance (two-tailed) | 0.000 | 0.000 | 0.000 | 0.000 | 0.000 | 0.000 | 0.000 | 0.000 | 0.000 | 0.000 | 0.000 | 0.000 | 0.000 | 0.000 | 0.000 | 0.000 | 0.000 | 0.000 | 0.000 | 0.000 | 0.000 | 0.000 | 0.000 | 0.000 | 0.000 | 0.000 | 0.000 | 0.000 | 0.000 | 0.000 |
| 2012 | Pearson Correlation | **.450**** | .407** | .350** | .423** | .428** | **.428**** | .340** | **.344**** | .335** | .358** | **.362**** | .359** | .371** | **.374**** | .370** | **.471**** | .428** | .355** | .022** | -.048** | **-.153**** | -.296** | **-.301**** | -.286** | **-.280**** | -.258** | -.238** | **.330**** | .274** | .199** |
| Significance (two-tailed) | 0.000 | 0.000 | 0.000 | 0.000 | 0.000 | 0.000 | 0.000 | 0.000 | 0.000 | 0.000 | 0.000 | 0.000 | 0.000 | 0.000 | 0.000 | 0.000 | 0.000 | 0.000 | 0.000 | 0.000 | 0.000 | 0.000 | 0.000 | 0.000 | 0.000 | 0.000 | 0.000 | 0.000 | 0.000 | 0.000 |
| 2013 | Pearson Correlation | **.412**** | .393** | .337** | .413** | .422** | **.424**** | .333** | **.338**** | .333** | .350** | **.356**** | .355** | .363** | **.368**** | .366** | **.447**** | .420** | .352** | .034** | -.039** | **-.151**** | -.287** | **-.293**** | -.278** | **-.272**** | -.268** | -.249** | **.367**** | .317** | .224** |
| Significance (two-tailed) | 0.000 | 0.000 | 0.000 | 0.000 | 0.000 | 0.000 | 0.000 | 0.000 | 0.000 | 0.000 | 0.000 | 0.000 | 0.000 | 0.000 | 0.000 | 0.000 | 0.000 | 0.000 | 0.000 | 0.000 | 0.000 | 0.000 | 0.000 | 0.000 | 0.000 | 0.000 | 0.000 | 0.000 | 0.000 | 0.000 |
| 2014 | Pearson Correlation | **.424**** | .394** | .321** | .410** | .417** | **.421**** | .334** | **.340**** | .338** | .352** | .358** | **.359**** | .364** | **.369**** | .369** | **.447**** | .412** | .335** | .027** | -.049** | **-.154**** | -.288** | **-.295**** | -.283** | **-.277**** | -.265** | -.256** | **.348**** | .330** | .266** |
| Significance (two-tailed) | 0.000 | 0.000 | 0.000 | 0.000 | 0.000 | 0.000 | 0.000 | 0.000 | 0.000 | 0.000 | 0.000 | 0.000 | 0.000 | 0.000 | 0.000 | 0.000 | 0.000 | 0.000 | 0.000 | 0.000 | 0.000 | 0.000 | 0.000 | 0.000 | 0.000 | 0.000 | 0.000 | 0.000 | 0.000 | 0.000 |
| 2015 | Pearson Correlation | **.423**** | .398** | .334** | .404** | .410** | **.411**** | .335** | **.336**** | .330** | .349** | **.353**** | .350** | .359** | **.361**** | .359** | **.460**** | .412** | .330** | .027** | -.057** | **-.168**** | -.290** | **-.295**** | -.281** | **-.271**** | -.260** | -.246** | **.365**** | .328** | .263** |
| Significance (two-tailed) | 0.000 | 0.000 | 0.000 | 0.000 | 0.000 | 0.000 | 0.000 | 0.000 | 0.000 | 0.000 | 0.000 | 0.000 | 0.000 | 0.000 | 0.000 | 0.000 | 0.000 | 0.000 | 0.000 | 0.000 | 0.000 | 0.000 | 0.000 | 0.000 | 0.000 | 0.000 | 0.000 | 0.000 | 0.000 | 0.000 |
| 2016 | Pearson Correlation | **.415**** | .373** | .303** | .407** | .410** | **.410**** | .338** | **.340**** | .340** | .350** | .354** | **.357**** | .358** | .361** | **.363**** | **.434**** | .389** | .315** | .036** | -.052** | **-.153**** | -.275** | **-.281**** | -.270** | **-.255**** | -.247** | -.235** | **.363**** | .327** | .237** |
| Significance (two-tailed) | 0.000 | 0.000 | 0.000 | 0.000 | 0.000 | 0.000 | 0.000 | 0.000 | 0.000 | 0.000 | 0.000 | 0.000 | 0.000 | 0.000 | 0.000 | 0.000 | 0.000 | 0.000 | 0.000 | 0.000 | 0.000 | 0.000 | 0.000 | 0.000 | 0.000 | 0.000 | 0.000 | 0.000 | 0.000 | 0.000 |
| 2017 | Pearson Correlation | **.431**** | .381** | .306** | .417** | .422** | **.422**** | .351** | **.351**** | .344** | .363** | **.366**** | .364** | .371** | **.374**** | .371** | **.432**** | .384** | .295** | .038** | -.056** | **-.167**** | -.307** | **-.312**** | -.303** | -.218** | **-.222**** | -.220** | **.354**** | .336** | .277** |
| Significance (two-tailed) | 0.000 | 0.000 | 0.000 | 0.000 | 0.000 | 0.000 | 0.000 | 0.000 | 0.000 | 0.000 | 0.000 | 0.000 | 0.000 | 0.000 | 0.000 | 0.000 | 0.000 | 0.000 | 0.000 | 0.000 | 0.000 | 0.000 | 0.000 | 0.000 | 0.000 | 0.000 | 0.000 | 0.000 | 0.000 | 0.000 |
| 2018 | Pearson Correlation | **.460**** | .424** | .348** | .436** | .441** | **.441**** | .349** | **.355**** | .348** | .367** | **.373**** | .372** | .378** | **.384**** | .383** | **.477**** | .436** | .352** | -.023** | -.109** | **-.216**** | -.301** | **-.309**** | -.298** | **-.301**** | -.287** | -.265** | **.403**** | .373** | .295** |
| Significance (two-tailed) | 0.000 | 0.000 | 0.000 | 0.000 | 0.000 | 0.000 | 0.000 | 0.000 | 0.000 | 0.000 | 0.000 | 0.000 | 0.000 | 0.000 | 0.000 | 0.000 | 0.000 | 0.000 | 0.000 | 0.000 | 0.000 | 0.000 | 0.000 | 0.000 | 0.000 | 0.000 | 0.000 | 0.000 | 0.000 | 0.000 |
| 2019 | Pearson Correlation | **.428**** | .416** | .347** | .445** | .447** | **.447**** | .370** | **.370**** | .363** | .386** | **.388**** | .384** | .396** | **.398**** | .394** | **.472**** | .443** | .373** | .040** | -.057** | **-.174**** | -.318** | **-.324**** | -.306** | -.281** | **-.282**** | -.267** | **.359**** | .339** | .275** |
| Significance (two-tailed) | 0.000 | 0.000 | 0.000 | 0.000 | 0.000 | 0.000 | 0.000 | 0.000 | 0.000 | 0.000 | 0.000 | 0.000 | 0.000 | 0.000 | 0.000 | 0.000 | 0.000 | 0.000 | 0.000 | 0.000 | 0.000 | 0.000 | 0.000 | 0.000 | 0.000 | 0.000 | 0.000 | 0.000 | 0.000 | 0.000 |
| 2020 | Pearson Correlation | **.459**** | .417** | .320** | .448** | **.452**** | .451** | .365** | **.370**** | .366** | .385** | **.391**** | .390** | .402** | **.403**** | .400** | **.480**** | .437** | .352** | -.006** | -.092** | **-.197**** | -.321** | **-.327**** | -.311** | **-.313**** | -.296** | -.278** | **.429**** | .429** | .317** |
| Significance (two-tailed) | 0.000 | 0.000 | 0.000 | 0.000 | 0.000 | 0.000 | 0.000 | 0.000 | 0.000 | 0.000 | 0.000 | 0.000 | 0.000 | 0.000 | 0.000 | 0.000 | 0.000 | 0.000 | 0.000 | 0.000 | 0.000 | 0.000 | 0.000 | 0.000 | 0.000 | 0.000 | 0.000 | 0.000 | 0.000 | 0.000 |
| 2021 | Pearson Correlation | **.420**** | .403** | .339** | .440** | **.443**** | .442** | .362** | **.365**** | .352** | .380** | **.383**** | .376** | .392** | **.394**** | .387** | **.452**** | .412** | .339** | .027** | -.093** | **-.210**** | -.312** | **-.318**** | -.291** | **-.294**** | -.294** | -.278** | **.370**** | .362** | .306** |
| Significance (two-tailed) | 0.000 | 0.000 | 0.000 | 0.000 | 0.000 | 0.000 | 0.000 | 0.000 | 0.000 | 0.000 | 0.000 | 0.000 | 0.000 | 0.000 | 0.000 | 0.000 | 0.000 | 0.000 | 0.000 | 0.000 | 0.000 | 0.000 | 0.000 | 0.000 | 0.000 | 0.000 | 0.000 | 0.000 | 0.000 | 0.000 |

**A:** it represents climate impacts on vegetation with a two-month lag and a one-month accumulation;

**B:** it represents climate impacts on vegetation with a one-month lag and a two-month accumulation;

**C:** it represents climate impacts on vegetation with a one-month lag and a one-month accumulation.

For different climate impacts with the same correlation for the same climate, we choose the same impacts as in the previous year (Bolding in the table indicates).

**Supplementary Fig. 1 Patterns of distribution of global forest spatial structure indices, 2005-2020.**


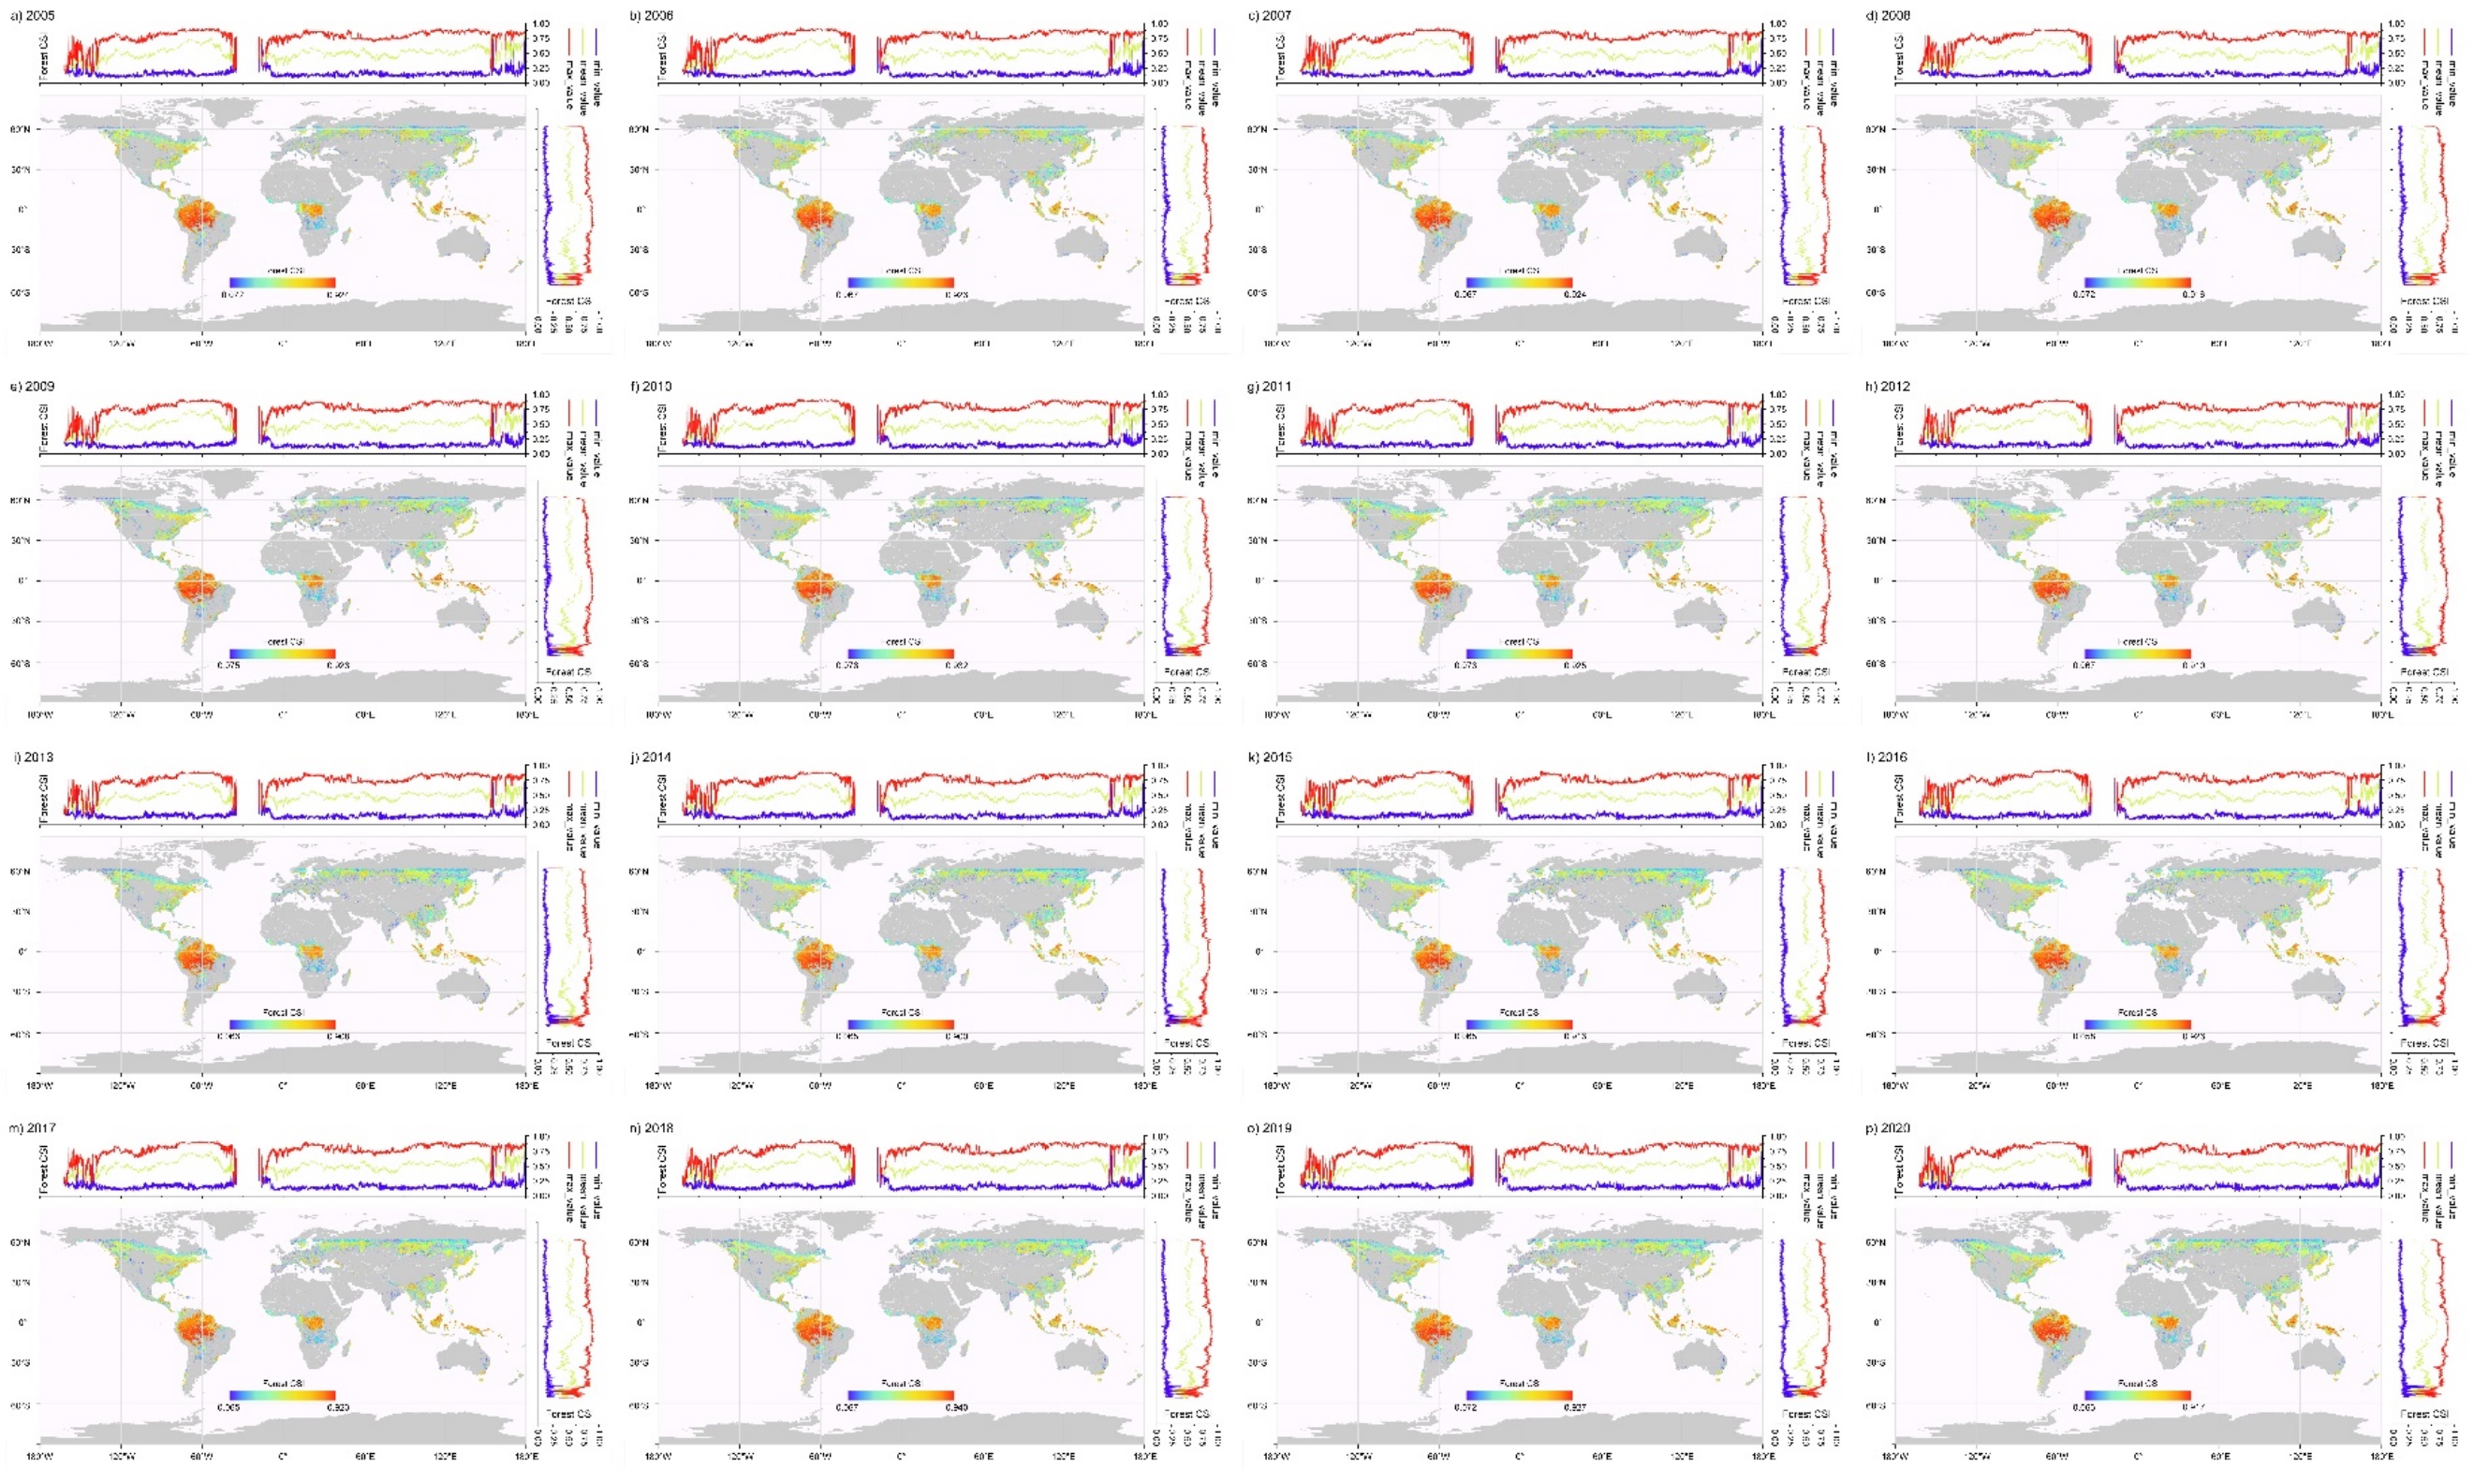

Supplement: Supplementary file 1 [file fca64191c1d8e8f191db3ff9.docx]
